# Supplementary material
Source: HighWire-hosted journal article supplement (http://www.jneurosci.org/highwire/filestream/598855/field_highwire_adjunct_files/0/S1_ELISPOT_GPNMB_SMA560CRCL.pdf)
Supplement: S1_ELISPOT_GPNMB_SMA560CRCL.pdf [file S1_ELISPOT_GPNMB_SMA560CRCL.pdf]

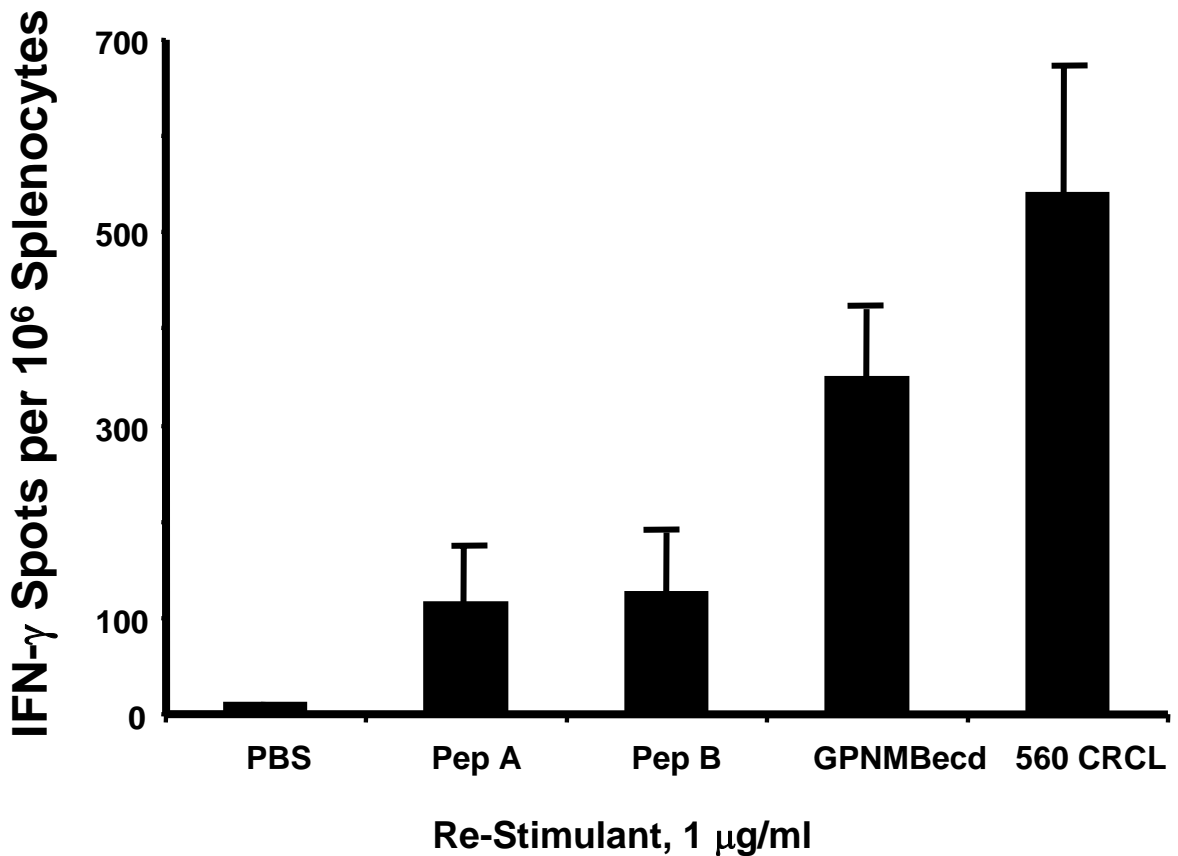

Mice receiving brain tumor-derived CRCL vaccines develop specific T cell reactivity against brain tumor antigens.

VM/Dk mice were vaccinated with 2 x 20 μg SMA560-derived CRCL; splenocytes harvested, plated, and re-stimulated with the antigens shown (GPNMBecd = extracellular domain of glycoprotein non-metastatic B; Pep A and Pep B are GPNMB 15-mer peptides). Interferon-gamma output was quantified by ELISPOT assay.
